# Supplementary material for: HPV Infection Significantly Accelerates Glycogen Metabolism in Cervical Cells with Large Nuclei: Raman Microscopic Study with Subcellular Resolution
Source: MDPI journal article supplement (doi:10.3390/ijms21082667), 2020-04-11
Supplement: s1 [file s1]

## Supplementary Materials

# HPV infection significantly accelerates glycogen metabolism in cervical cells with large nuclei: Raman microscopic study with subcellular resolution

Katarzyna Sitarz <sup>1,2</sup>, Krzysztof Czamara <sup>3</sup>, Joanna Bialecka <sup>4</sup>, Malgorzata Klimek <sup>5</sup>, Barbara Zawilinska <sup>1</sup>, Slawa Szostek <sup>1\*</sup> and Agnieszka Kaczor <sup>2,3\*</sup>

<sup>1</sup> Jagiellonian University Medical College, Faculty of Medicine, Chair of Microbiology, Department of Virology, 18 Czysa Street, 31-121 Krakow, Poland.

<sup>2</sup> Jagiellonian University, Faculty of Chemistry, 2 Gronostajowa Street, 30-387 Krakow, Poland.

<sup>3</sup> Jagiellonian University, Jagiellonian Centre for Experimental Therapeutics (JCET), 14 Bobrzynskiego Street, 30-348 Krakow, Poland.

<sup>4</sup> Centre of Microbiological Research and Autovaccines, 17 Slawkowska Street, 31-016 Krakow, Poland.

<sup>5</sup> Maria Sklodowska-Curie Institute – Oncology Center, Clinic of Radiotherapy, 11 Garncarska Street, 31-115 Krakow, Poland\* Correspondence: Agnieszka Kaczor (agnieszka.kaczor@uj.edu.pl) and Slawa Szostek (slawa.szostek@uj.edu.pl)

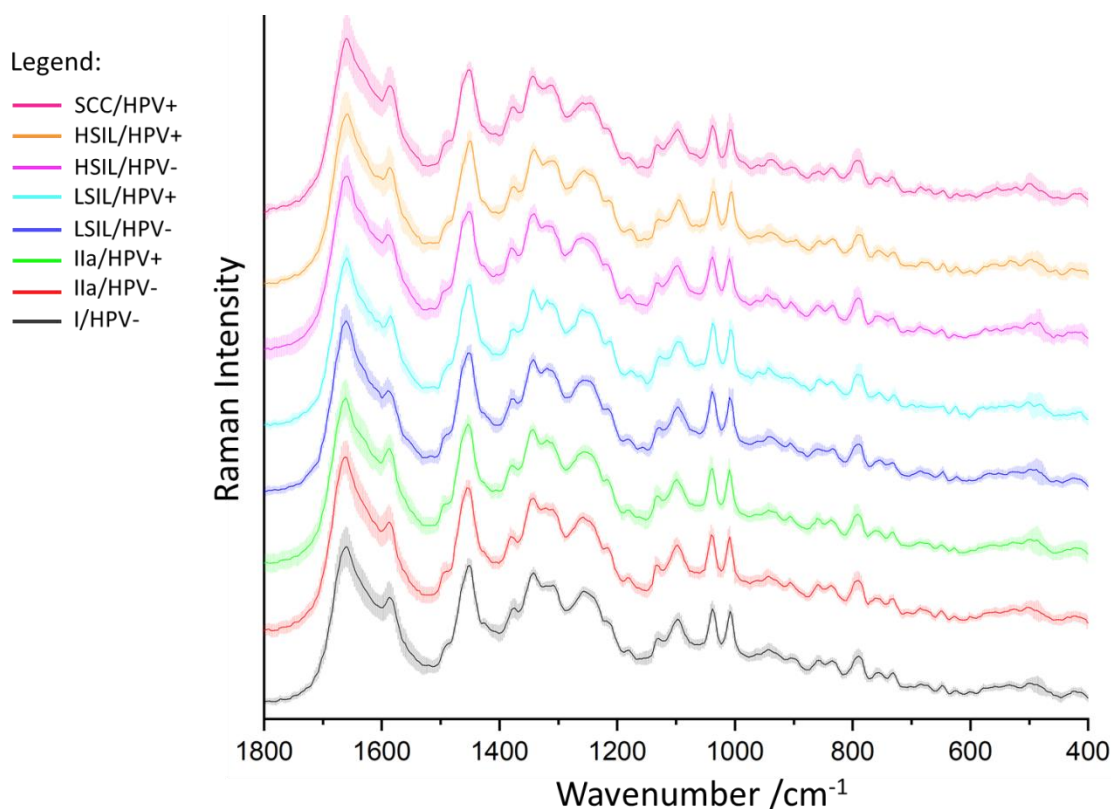

**Figure S1. Raman average spectra of nuclei in cervical cells in studied groups of females.** Presented Raman spectra were averaged over all nuclei in the studied group and the nuclei were separated based on Cluster Analysis (K-means, Manhattan distance).

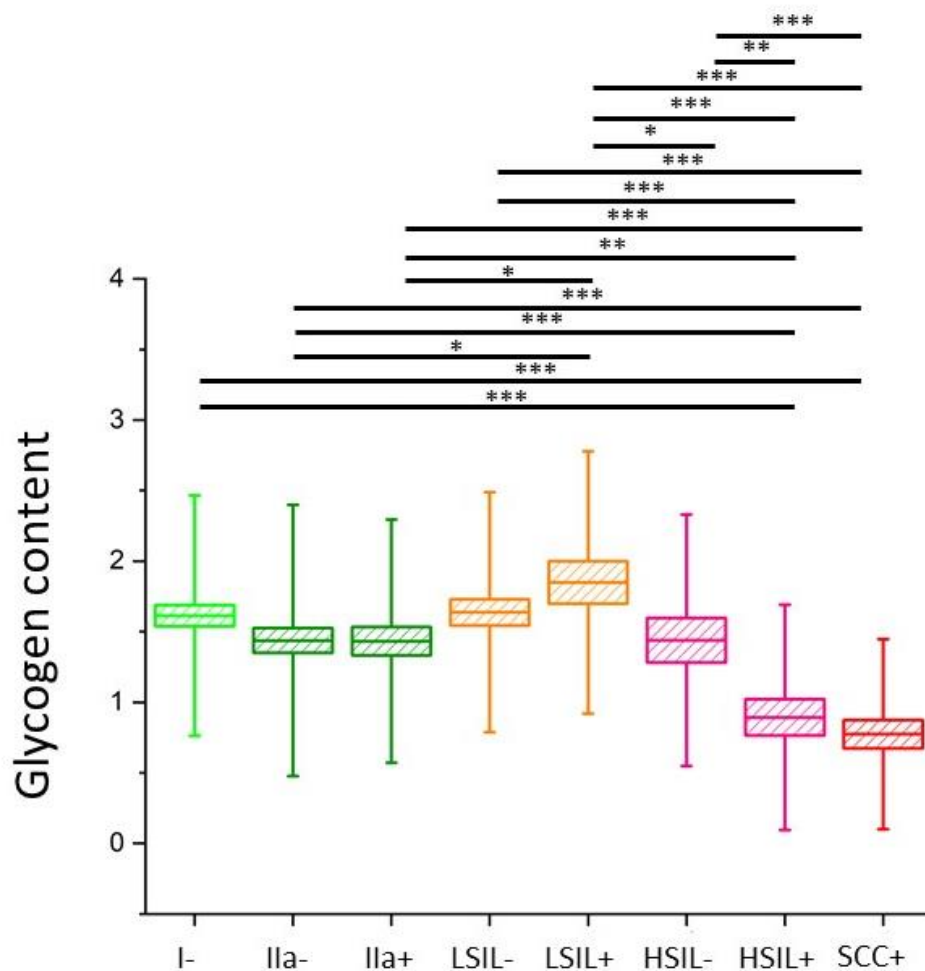

**Figure S2. Glycogen content in the cytoplasm of cervical epithelial cells.** The comparison of the glycogen content in the cytoplasm of cervical epithelial cells in studied groups: I/HPV- (bright green), IIa/HPV- (dark green), IIa/HPV+ (dark green), LSIL/HPV- (orange), LSIL/HPV+ (orange), HSIL/HPV- (pink), HSIL/HPV+ (pink), SCC/HPV+ (red) obtained by calculations of the integral intensity of the glycogen marker band at 486 cm<sup>-1</sup> in studied cells (in total 560). Mean values  $\pm$  SEM are given as box plots: mean (horizontal line), SEM (box), minimal and maximal values (whiskers). \*  $p < 0.05$  \*\*  $p < 0.01$  \*\*\*  $p < 0.001$ .

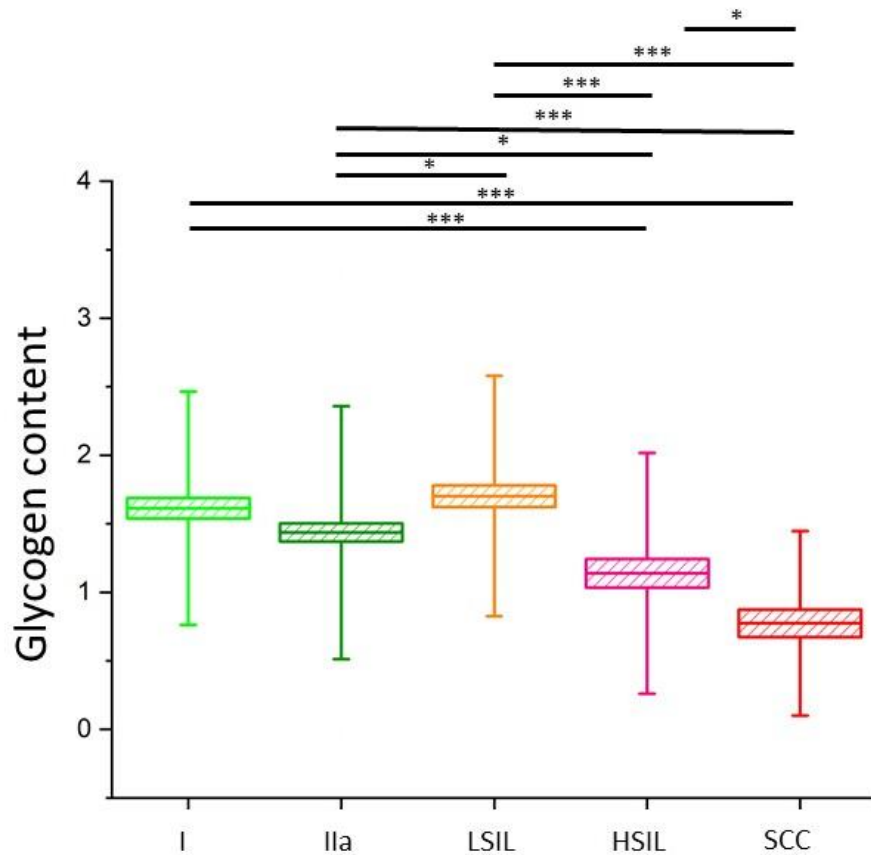

**Figure S3. Glycogen content in the cytoplasm of cervical epithelial cells without HPV-infection based differentiation.** The comparison of the glycogen content in the cytoplasm of cervical epithelial cells in studied groups: I (bright green), IIa (dark green), LSIL (orange), HSIL (pink), SCC (red) obtained by calculations of the integral intensity of the glycogen marker band at 486 cm<sup>-1</sup> in studied cells (in total 560). Mean values  $\pm$  SEM are given as box plots: mean (horizontal line), SEM (box), minimal and maximal values (whiskers). \*  $p < 0.05$  \*\*\*  $p < 0.001$ .

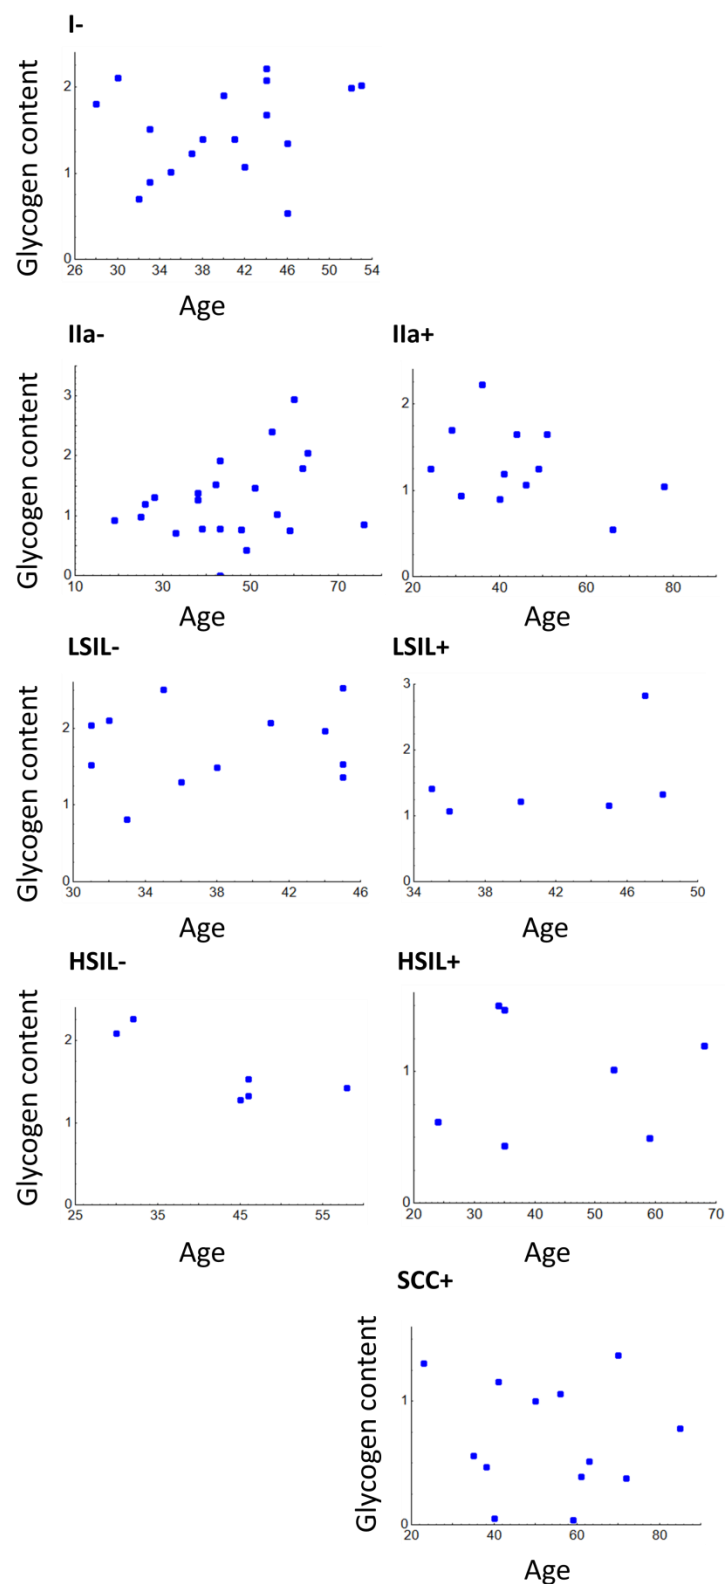

**Figure S4. Glycogen content in the cytoplasm of cervical epithelial cells as a function of age.** Analysis of the correlation between the average amount of glycogen (obtained by calculations of the integral intensity of the glycogen marker band at  $941\text{ cm}^{-1}$ ) in the cytoplasm of cells and the age of females in individual groups. Each blue circle represents average data for one patient. Graphs present individual groups of patients: I/HPV- (A), IIa/HPV- (B), IIa/HPV+ (C), LSIL/HPV- (D), LSIL/HPV+ (E), HSIL/HPV- (F), HSIL/HPV+ (G), SCC/HPV+ (H).

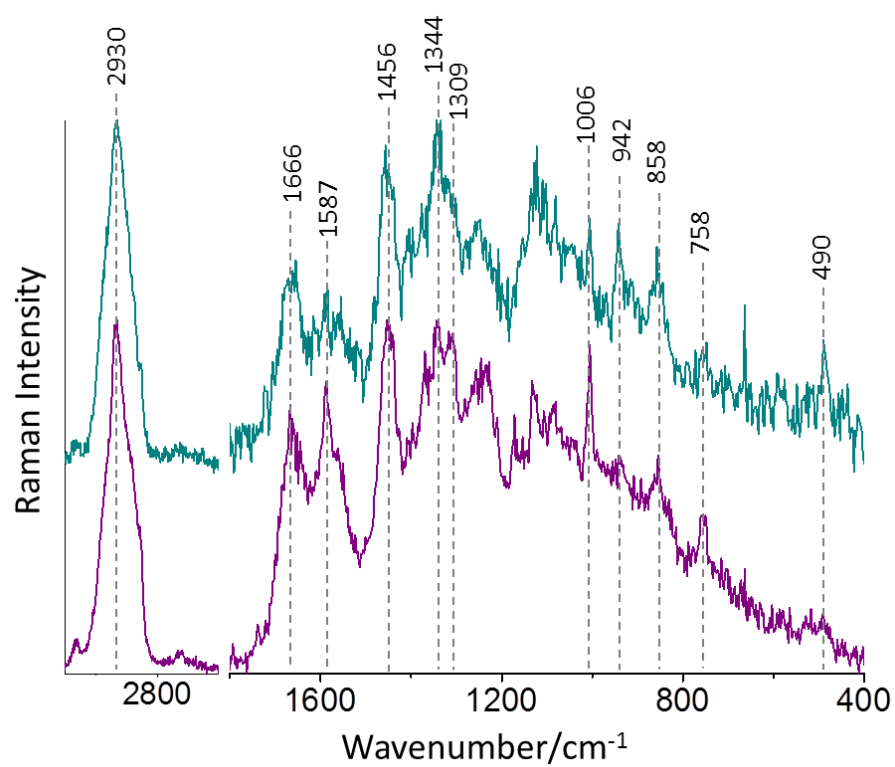

**Figure S5. Single Raman spectra of dry pellets of cervical epithelial cells of two patients differing in the glycogen level obtained using fiber optic Raman spectroscopy.** Spectra were acquired with a novel portable Raman fiber optic probe (WITec, Germany) using the 532 nm laser excitation. Each spectrum was accumulated with the 4 s integration time and 10 accumulations.

**Table S1. The number of patients in studied groups.**

| Analyzed group           | HPV status   | Number of patients |
|--------------------------|--------------|--------------------|
| I                        | HPV-<br>HPV+ | 18<br>0            |
| Ila                      | HPV-<br>HPV+ | 22<br>12           |
| IIID-1=LSIL <sup>a</sup> | HPV-<br>HPV+ | 12<br>6            |
| IIID-2=HSIL <sup>b</sup> | HPV-<br>HPV+ | 6<br>7             |
| SCC <sup>c</sup>         | HPV-<br>HPV+ | 0<br>13            |

<sup>a</sup> low-grade squamous intraepithelial lesion

<sup>b</sup> high-grade squamous intraepithelial lesion

<sup>c</sup> histopathologically confirmed squamous cell carcinoma

**Table S2. Glycogen content in studied epithelial cervical cells.** Glycogen content calculated based on the relative intensity of the Raman band at 486 cm<sup>-1</sup>.

| Classification                          | Number of cells | Relative glycogen content          | Statistical significance                                                                              |
|-----------------------------------------|-----------------|------------------------------------|-------------------------------------------------------------------------------------------------------|
| <b>Cells with small-diameter nuclei</b> |                 |                                    |                                                                                                       |
| I/HPV-                                  | 83              | Mean: 1.75<br>SD: 0.84<br>SE: 0.09 | LSIL/HPV+***<br>HSIL/HPV+*<br>SCC/HPV+***                                                             |
| Ila/HPV-                                | 65              | Mean: 1.61<br>SD: 1.00<br>SE: 0.12 | LSIL/HPV+***<br>SCC/HPV+***                                                                           |
| Ila/HPV+                                | 55              | Mean: 1.69<br>SD: 0.81<br>SE: 0.11 | LSIL/HPV+***<br>HSIL/HPV+*<br>SCC/HPV+***                                                             |
| LSIL/HPV-                               | 68              | Mean: 1.65<br>SD: 0.85<br>SE: 0.10 | LSIL/HPV+***<br>HSIL/HPV+*<br>SCC/HPV+***                                                             |
| LSIL/HPV+                               | 24              | Mean: 2.38<br>SD: 0.69<br>SE: 0.14 | I/HPV-***<br>Ila/HPV-***<br>Ila/HPV+***<br>LSIL/HPV-***<br>HSIL/HPV-**<br>HSIL/HPV+***<br>SCC/HPV+*** |

|                                         |    |                                    |                                                                                                       |
|-----------------------------------------|----|------------------------------------|-------------------------------------------------------------------------------------------------------|
| <b>HSIL/HPV-</b>                        | 18 | Mean: 1.70<br>SD: 0.73<br>SE: 0.17 | LSIL/HPV+**<br>HSIL/HPV+*<br>SCC/HPV+***                                                              |
| <b>HSIL/HPV+</b>                        | 17 | Mean: 1.16<br>SD: 0.92<br>SE: 0.22 | I/HPV-*<br>IIa/HPV+*<br>LSIL/HPV-*<br>LSIL/HPV+***<br>HSIL/HPV-*<br>SCC/HPV+*                         |
| <b>SCC/HPV+</b>                         | 21 | Mean: 0.56<br>SD: 0.55<br>SE: 0.12 | I/HPV-***<br>IIa/HPV-***<br>IIa/HPV+***<br>LSIL/HPV-***<br>LSIL/HPV+***<br>HSIL/HPV-***<br>HSIL/HPV+* |
| <b>Cells with large-diameter nuclei</b> |    |                                    |                                                                                                       |
| <b>I/HPV-</b>                           | 43 | Mean: 1.35<br>SD: 0.82<br>SE: 0.12 | IIa/HPV+**<br>HSIL/HPV+***<br>SCC/HPV+ *                                                              |
| <b>IIa/HPV-</b>                         | 56 | Mean: 1.23<br>SD: 0.88<br>SE: 0.12 | IIa/HPV+*<br>HSIL/HPV+ **                                                                             |
| <b>IIa/HPV+</b>                         | 19 | Mean: 0.68<br>SD: 0.49<br>SE: 0.11 | I/HPV-**<br>IIa/HPV-*<br>LSIL/HPV-**                                                                  |
| <b>LSIL/HPV-</b>                        | 17 | Mean: 1.57<br>SD: 0.87<br>SE: 0.21 | IIa/HPV+ **<br>LSIL/HPV+*<br>HSIL/HPV+**<br>SCC/HPV+*                                                 |
| <b>LSIL/HPV+</b>                        | 14 | Mean: 0.95<br>SD: 0.48<br>SE: 0.13 | LSIL/HPV-*<br>HSIL/HPV+*                                                                              |
| <b>HSIL/HPV-</b>                        | 14 | Mean: 1.10<br>SD: 0.99<br>SE: 0.26 | -                                                                                                     |
| <b>HSIL/HPV+</b>                        | 22 | Mean: 0.69<br>SD: 0.63<br>SE: 0.13 | I/HPV-***<br>IIa/HPV-**<br>LSIL/HPV-**<br>LSIL/HPV+*                                                  |
| <b>SCC/HPV+</b>                         | 24 | Mean: 0.97<br>SD: 0.72<br>SE: 0.15 | I/HPV-*<br>LSIL/HPV-*                                                                                 |

\*p<0.05 \*\*p<0.01 \*\*\*p<0.001

**Table S3. Glycogen content in studied epithelial cervical cells.** Glycogen content calculated based on the percentage of cells stained with the PAS method.

| Classification | Number of samples | Relative glycogen content          | Statistical significance |
|----------------|-------------------|------------------------------------|--------------------------|
| <b>I</b>       | 10                | Mean: 70.1<br>SD: 8.7<br>SE: 2.9   | HSIL**<br>SCC*           |
| <b>Ila</b>     | 13                | Mean: 64.2<br>SD: 8.6<br>SE: 2.4   | HSIL**<br>SCC*           |
| <b>LSIL</b>    | 13                | Mean: 62.2<br>SD: 15.1<br>SE: 4.2  | HSIL**<br>SCC*           |
| <b>HSIL</b>    | 5                 | Mean: 24.6<br>SD: 22.8<br>SE: 10.2 | I**<br>Ila**<br>LSIL**   |
| <b>SCC</b>     | 3                 | Mean: 38.3<br>SD: 11.7<br>SE: 6.2  | I*<br>Ila*<br>LSIL*      |

\*p<0.05\*\*p<0.01
